# Supplementary material
Source: publisher figshare collection journal article supplement (https://tandf.figshare.com/ndownloader/files/17563787)
Supplement: Supplementary file 1 [file 17563787]

**Online supplementary information**

**Clinal polymorphism variation in the Booted Eagle *Hieraaetus pennatus*: the influence of climate during the breeding season**

JOSEP BOSCH

Cra. de Navarcles, 43, 08251, Santpedor, Barcelona, Spain

Email: [jboschprat@hotmail.com](mailto:jboschprat@hotmail.com)

**Table S1.** Diet of Booted Eagles in the Palearctic and South Africa. Classes of prey for each study area (%); *n* = total number of prey items collected.

| Area | Birds % | Mammals % | Reptiles % | Amphibians % | *n* | Source |
| --- | --- | --- | --- | --- | --- | --- |
| Spain | 73.40 | 13.30 | 11.24 | - | 2429 | see Table S2 |
| South Africa | 54.54 | 12.73 | 32.73 | - | 55 | Steyn & Grobler 1981 |
| Ukraine | 77 | 9.8 | 13.2 | - | 61 | Moroz & Vetrov 2013 |
| Volga-Ural | 53.52 | 42.25 | 1.41 | 2.82 | 71 | Karyakin 2007 |
| W. Siberia | 41.94 | 51.61 | 6.45 | - | 31 | Karyakin 2007 |
| Altai-Sayan | 10.69 | 89.31 | - | - | 131 | Karyakin 2007 |

**Table S2.** Diet of Booted Eagles in the Iberian Peninsula. Classes of prey for each study area (%); *n* = total number of prey items collected.

| Area | Birds % | Mammals % | Reptiles % | Insects % | *n* | Source |
| --- | --- | --- | --- | --- | --- | --- |
| Central Catalonia | 96.46 | 3.54 | - | - | 113 | (unpub. own data) |
| Ports Natural Park | 48.99 | 43.94 | 3.03 | - | 198 | J. Mestre (*pers.comm.*) |
| Murcia province | 68.02 | 11.14 | 15.81 | 5.03 | 835 | Martínez *et al.* 2004 |
| Tiétar valley | 76.92 | 11.22 | 11.86 | - | 1105 | García-Dios 2006 |
| Guadarrama Sierra | 89.33 | 8.43 | 2.25 | - | 178 | Dìaz 2006 |

**Table S3.** Sources of weather data and positions of weather stations in the Palaearctic Region and South Africa. Study areas in bold.

| Station | Longitude | Latitude | Altitude (m) | Source |
| --- | --- | --- | --- | --- |
| **Spain** | 2º W | 40 N | 624 | see Table S4 |
| **France** |  |  |  |  |
| Bourges | 2º 21' E | 47º 03' N | 166 | climatemps.com |
| Montpellier | 3º 58' E | 43º 34' N | 5 | climatemps.com |
| Nîmes | 4º 24' E | 43º 51' N | 62 | climatemps.com |
| Toulouse | 1º 22' E | 43º 37' N | 150 | climatemps.com |
| **Greece** |  |  |  |  |
| Athens | 23º 42' E | 38º 00' N | 28 | climatemps.com |
| Thessaloniki | 22º 57' E | 40º 30' N | 4 | climatemps.com |
| Ioannina | 20º 49' E | 39º 42' N | 483 | climatemps.com |
| **Ukraine** |  |  |  |  |
| Jarkov | 36º 10' E | 49º 59' N | 138 | climatemps.com |
| Dniepropetrovsk | 34º 58' E | 48º 36' N | 143 | climatemps.com |
| Rostov on Don | 39º 49' E | 47º 15' N | 78 | russia.climatemps.com |
| Lugansk | 39º 15' E | 48º 34' N | 62 | Climate-Data.org |
| Donets | 37º 45' E | 48º 04' N | 225 | Climate-Data.org |
| **Volga-Ural Region** |  |  |  |  |
| Kujbysev | 50º 30' E | 53º 17' N | 44 | russia.climatemps.com |
| Krasnojarsk | 59º 53' E | 51º 57' N | 342 | russia.climatemps.com |
| Orenburg | 55º 05' E | 51º 42' N | 118 | russia.climatemps.com |
| Saratov | 46º 02' E | 51º 33' N | 167 | russia.climatemps.com |
| Aleksandrov-Gaj | 48º32' E | 50º 08' N | 25 | russia.climatemps.com |
| **Western Siberia** |  |  |  |  |
| Barnaul | 83º 30' E | 53º 25' N | 185 | russia.climatemps.com |
| Barabinsk | 78º 18' E | 55º 21' N | 120 | russia.climatemps.com |
| Novosibirsk | 82º 54' E | 55º 02' N | 162 | russia.climatemps.com |
| Omsk | 73º 23' E | 55º 01' N | 122 | russia.climatemps.com |
| **Altai-Sayan** |  |  |  |  |
| Ak-Erik | 94º 37' E | 50º 30' N | 952 | Climate-Data.org |
| Erzin | 95º 09' E | 50º 15' N | 1110 | Climate-Data.org |
| Bondarevo | 90º 30' E | 52º 56' N | 485 | Climate-Data.org |
| Bay Dag | 95º 06' E | 50º 18' N | 1080 | Climate-Data.org |
| Minusinsk | 91º 42' E | 53º 43' N | 254 | russia.climatemps.com |
| Zigalovo | 105º 10' E | 54º 47' N | 419 | russia.climatemps.com |
| Nizne-Udinsk | 99º 01' E | 54º 53' N | 411 | russia.climatemps.com |
| **South Africa** |  |  |  |  |
| Cape Town | 18º 36' E | 33º 58' S | 42 | climatemps.com |
| Port Elizabeth | 25º 36' E | 33º 59' S | 63 | climatemps.com |
| Kimberley | 24º 48' E | 28º 48' S | 1196 | climatemps.com |

**Table S4.** Sources of weather data and positions of weather stations in Spain. Study areas in bold.

| Station | Longitude | Latitude | Altitude (m) | Source |
| --- | --- | --- | --- | --- |
| **Central Catalonia** |  |  |  |  |
| Castellnou de Bages | 1º 51' E | 41º 50' N | 507 | Climate-Data.org |
| Sant Mateu de Bages | 1º 38' E | 41º 48' N | 872 | Climate-Data.org |
| Solsona | 1º 30' E | 41º 59' N | 691 | Climate-Data.org |
| Berga | 1º 50' E | 42º 06' N | 1167 | Climate-Data.org |
| **Ports Natural Park** |  |  |  |  |
| Tortosa | 0º 31' E | 40º 49' N | 14 | Climatemps.com |
| **Ávila district** |  |  |  |  |
| Ávila | 4º 40' W | 40º 39' N | 1130 | AEMET |
| **Tiétar Valley** |  |  |  |  |
| Guisando | 5º 08' W | 40º 13' N | 800 | Climate-Data.org |
| Arenas de San Pedro | 5º 05' W | 40º 12' N | 550 | Climate-Data.org |
| **Madrid** |  |  |  |  |
| Navacerrada | 4º 00' W | 40º 47' N | 1890 | Climate-Data.org; AEMET |
| Segovia | 4º 06' W | 40º 56' N | 1005 | Climate-Data.org; AEMET |
| **Navarra** |  |  |  |  |
| Zubiri | 1º 30' W | 42º 56' N | 530 | Climate-Data.org |
| Pamplona | 1º 38' W | 42º 46' N | 452 | Climate-Data.org |
| **Cáceres** |  |  |  |  |
| Plasencia | 6º 05' W | 40º 02' N | 400 | Climate-Data.org |
| Cabezuela del Valle | 5º 48' W | 40º 11' N | 540 | Climate-Data.org |
| Jerte | 5º 45' W | 40º 13' N | 630 | Climate-Data.org |
| **Majorca Island** |  |  |  |  |
| Sòller | 2º 43' E | 39º 46' N | 50 | Climate-Data.org |
| Inca | 2º 55' E | 39º 43' N | 120 | Climate-Data.org |
| Buñola | 2º 42' E | 39º 42' N | 240 | Climate-Data.org |
| Lluc | 2º 53' E | 39º 49' N | 480 | Climate-Data.org |
| **Murcia** |  |  |  |  |
| CR 32 "El Chaparral" | 1º 41' W | 38º 05' N | 500 | AEMET |
| **Huelva** |  |  |  |  |
| Matalascañas | 6º 33' W | 37º 00' N | 20 | Climate-Data.org |

**REFERENCES**

**Díaz, J.** 2006. *El águila calzada y su conservación en la Comunidad de Madrid.* Comunidad de Madrid / Obra Social. Fundación “La Caixa” / FICAS. Madrid (in Spanish).

**García-Dios, I.S.** 2006. Dieta del aguililla calzada *Hieraaetus pennatus* en el sur de Ávila: importancia de los paseriformes. *Ardeola* **53**: 39-54 (in Spanish).

**Karyakin, I.V.** 2007.The Booted Eagle in the Volga Region, Ural and Siberia, Russia. *Raptors Conservation* **9**: 27–62.

**Martínez, J.E., Cremades, M., Pagán, I. & Calvo, J.F.** 2004. Diet of Booted eagles in Southeastern Spain. In, Chancellor, R.D. & Meyburg, B.-U.(eds.): *Raptors Worldwide*: 593–599. World Working Group on Birds of Prey and Owls.MMD/BirdLife. Budapest. Hungary.

**Moroz, V.A. & Vetrov, V.V.** 2013. About breeding of the Booted Eagle in the Lugansk District, Ukraine. *Raptors Conservation* **27**: 197–207.

**Steyn, P. & Grobler, J.H.** 1981. Breeding biology of the Booted Eagle in South Africa. *Ostrich* **52**: 108–118.
